# Supplementary material
Source: Springer Nature journal article supplement (https://www.springermedizin.de/resource/supplementary/13000_2013_895_MOESM2_ESM.pdf/9625074)

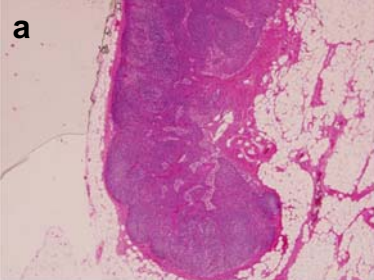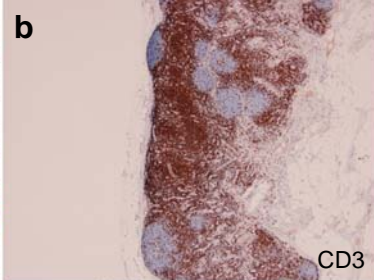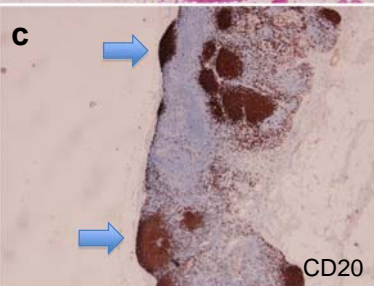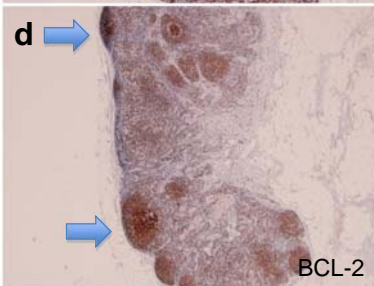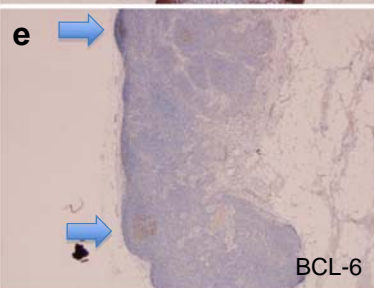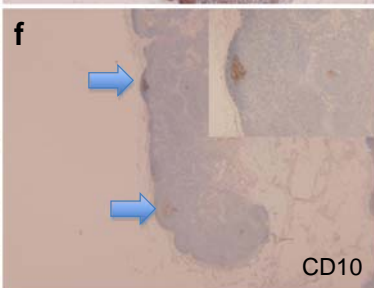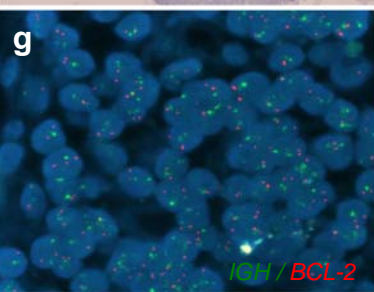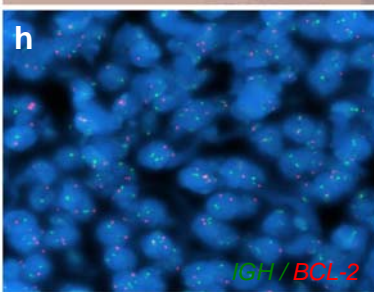

Supplement: MOESM2 [file 9625074]
